# Supplementary material for: Role of methionine adenosyltransferase 2A in bovine preimplantation development and its associated genomic regions
Source: PubMed Central journal article supplement (PMC5476596; doi:10.1038/s41598-017-04003-1), 2017-06-19
Supplement: 41598_2017_4003_MOESM1_ESM.pdf [file 41598_2017_4003_MOESM1_ESM.pdf]

1 **Role of methionine adenosyltransferase 2A in bovine preimplantation development and its**  
2 **associated genomic regions**

3

4 Shuntaro Ikeda<sup>1</sup>, Ryouka Kawahara-Miki<sup>2</sup>, Hisataka Iwata<sup>3</sup>, Miki Sugimoto<sup>1</sup> and Shinichi Kume<sup>1</sup>

5

6 <sup>1</sup> Laboratory of Animal Physiology and Functional Anatomy, Graduate School of Agriculture, Kyoto  
7 University, Kyoto 606-8502, Japan

8 <sup>2</sup> NODAI Genome Research Center, Tokyo University of Agriculture, Tokyo 156-8502, Japan

9 <sup>3</sup> Department of Animal Sciences, Tokyo University of Agriculture, Kanagawa 243-0034, Japan

10

11 **Supplementary figure legends**

12 Figure S1. Nuclear localization of MAT2A in bovine blastocyst cells. (A) Immunofluorescence  
13 image of MAT2A protein in blastocyst cells. Nuclei showing more abundant MAT2A compared with  
14 the cytoplasm are indicated by arrowheads. (B) Nuclear counterstaining with propidium iodide. (C)  
15 Merged image of (A) and (B). Scale bar represents 50  $\mu\text{m}$ .

16

17 Figure S2. Identification of MAT2A-ChIP specific peaks in duplicated ChIP-seq (Rep 1 and Rep 2).  
18 (A) 39 peaks (intersection) are specific for MAT2A-ChIP samples against Input in both replicates.  
19 (B) 59 peaks (intersection) are specific for MAT2A-ChIP samples against IgG control in both  
20 replicates. (C) The union of these peaks makes 76 MAT2A-ChIP specific peaks with 22 overlapping  
21 peaks.

22

23 Figure S3. Hierarchical tree graph of overrepresented GO terms in biological process generated by  
24 Singular Enrichment Analysis (SEA) of agriGO (<http://bioinfo.cau.edu.cn/agriGO/>). The first line in  
25 each significant box represents the GO term ID with the adjusted P-value in parentheses, followed  
26 by the lines indicating the term definition. In the last line of the significant box, the first pair of  
27 numerals represents the number of genes associated with the GO term and that of all genes in the  
28 query list and the second pair of numerals represents those in the *Bos taurus* database. The degree of  
29 colour saturation of the boxes is positively correlated with the enrichment level of the term: yellow,  
30  $<0.05$ ; orange,  $<5e-03$  -  $<5e-09$ ; and red,  $<5e-10$ . Solid, dashed, and dotted lines represent two, one  
31 and zero enriched terms at both ends connected by the line, respectively.

32

33

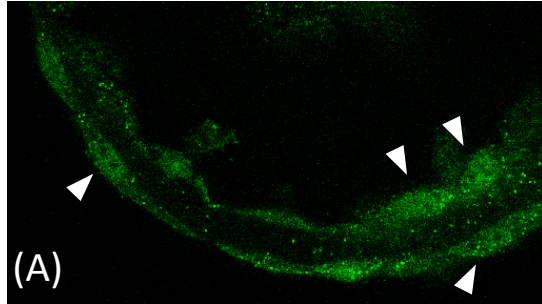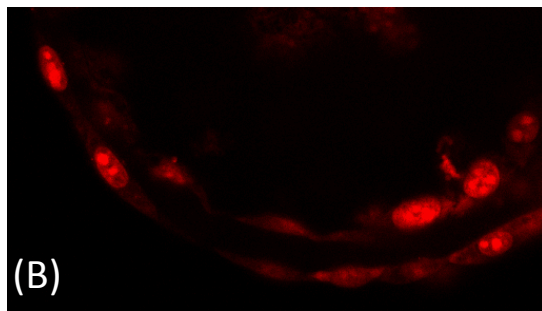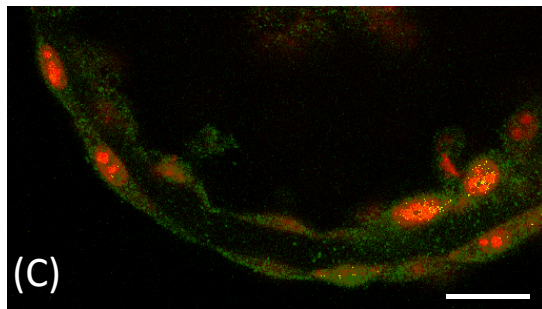

Figure S1

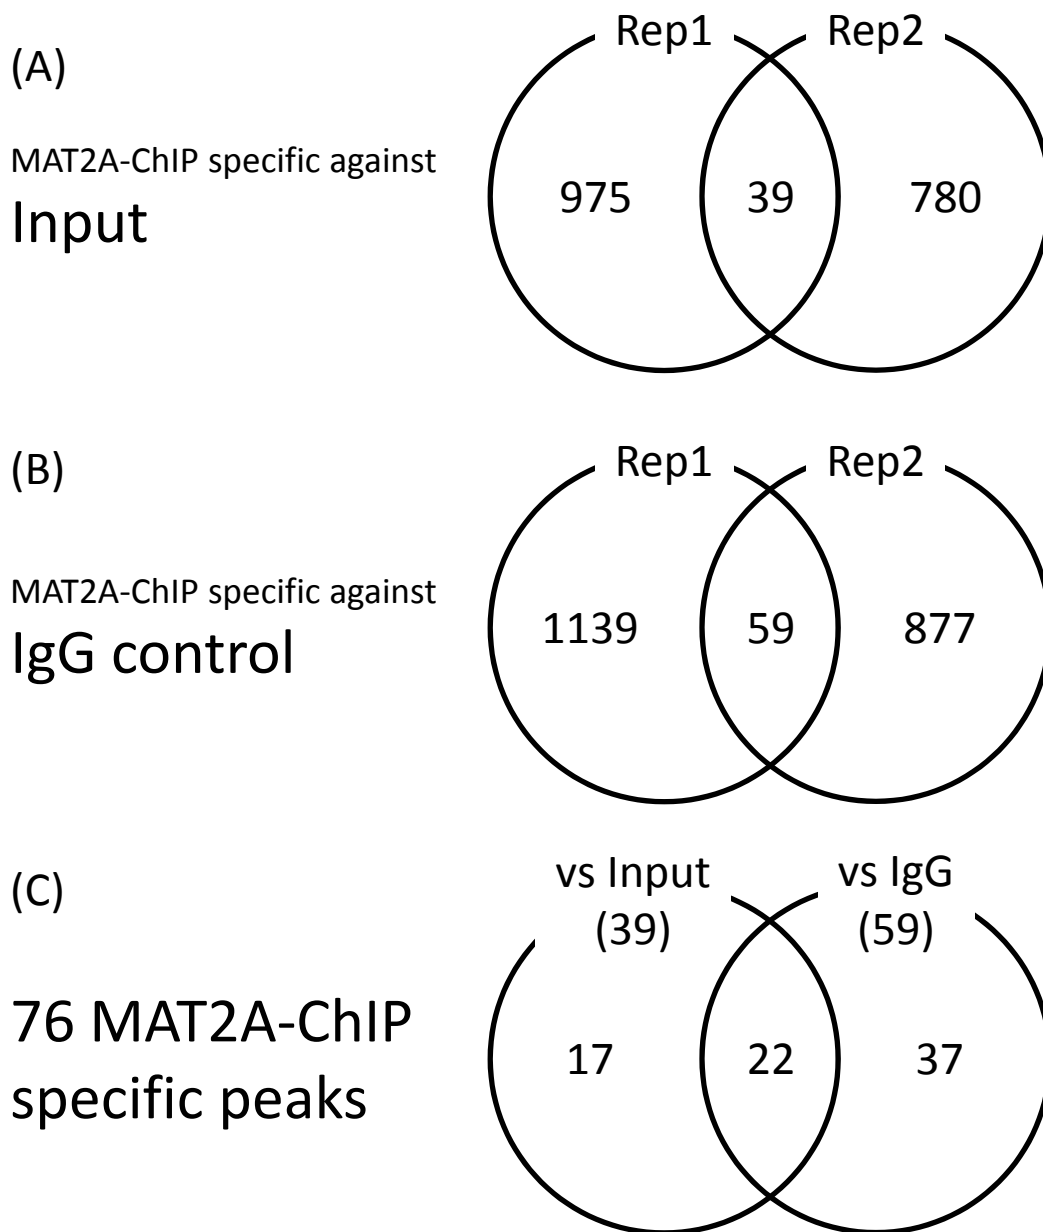

Figure S2

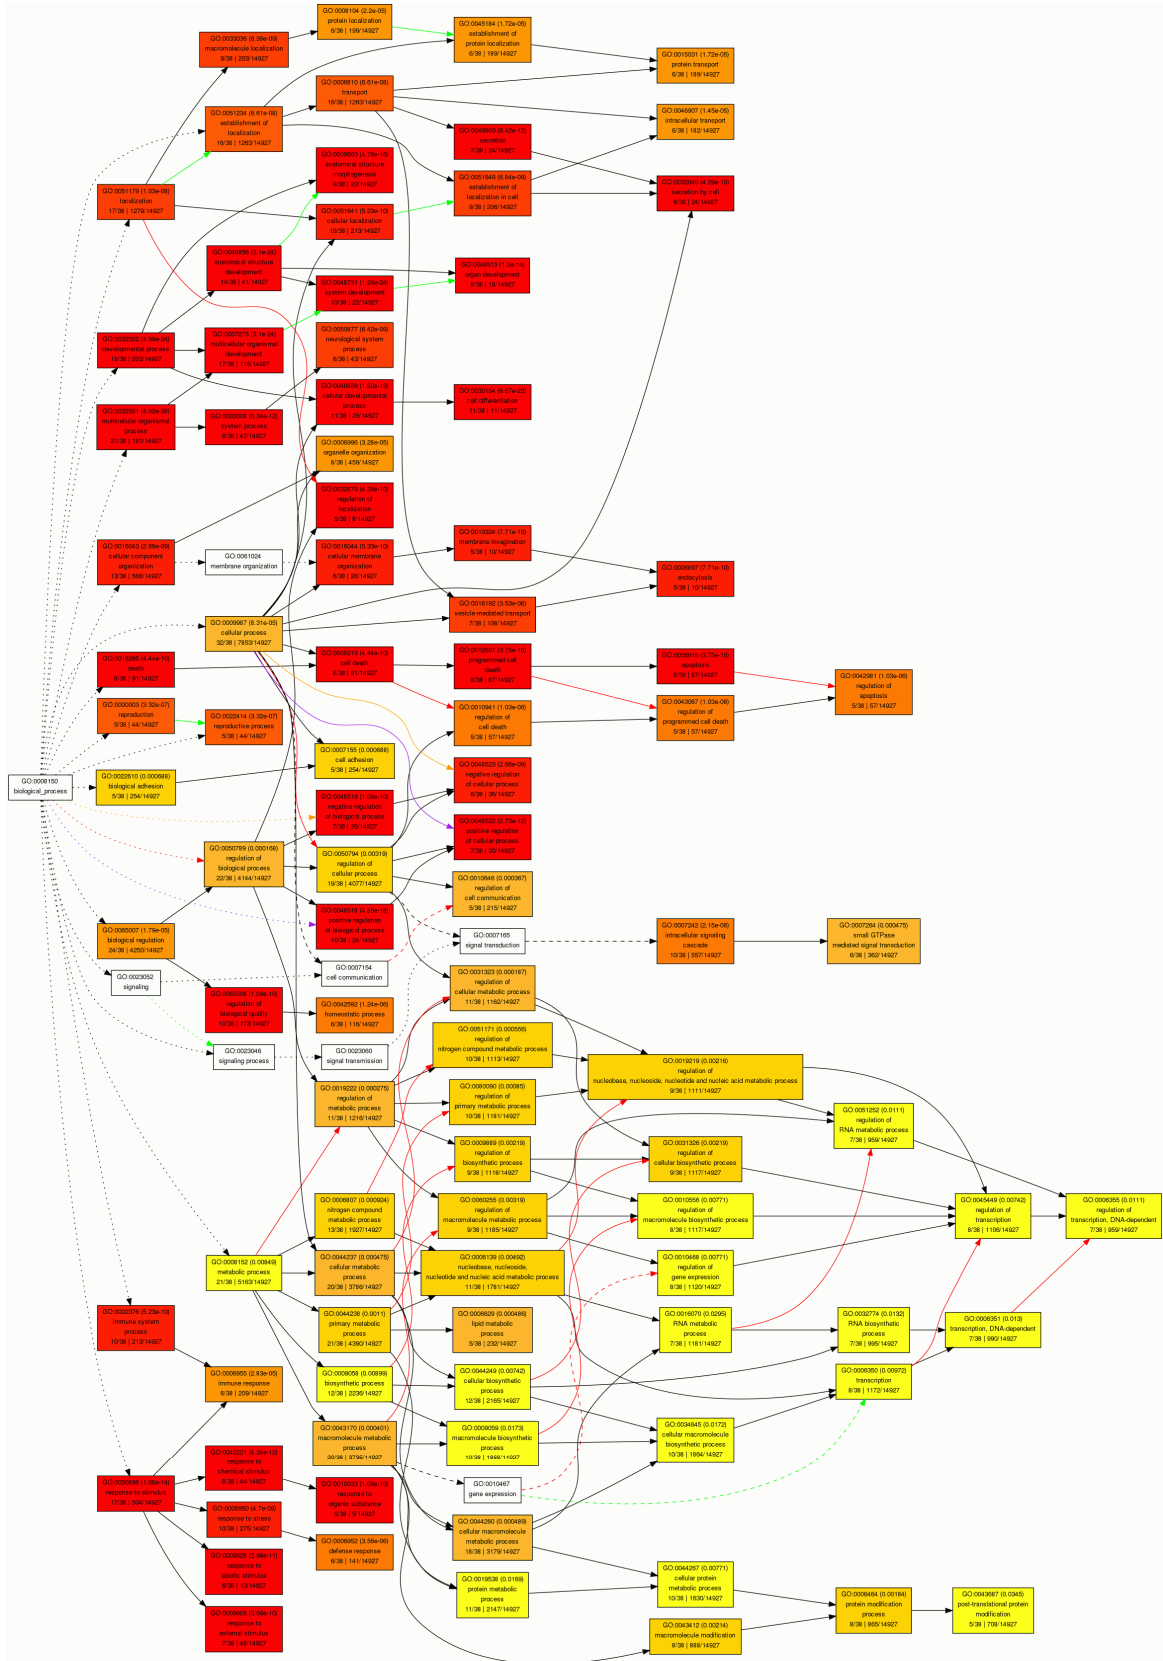

Figure S3

Table S3. The primer pairs used for validation of ChIP-seq peaks.

| Peak ID          | Primer sequences |                         |
|------------------|------------------|-------------------------|
| Peak 468         | Forward          | GGTAGTTCCCCAAAGGCTG     |
|                  | Reverse          | CAAGGGCTGGGGCATGTAAT    |
| Peak 1232        | Forward          | CAGCAGTCAGGCACCACTC     |
|                  | Reverse          | CTGCCAGCTTCTAGCGT       |
| Peak 1485        | Forward          | AAGTCAACACGAAGGGGCA     |
|                  | Reverse          | GGTTGAGGCATGGA ACTCCG   |
| Peak 1639        | Forward          | TTTGGTCTCTCTGTGCAGCTT   |
|                  | Reverse          | CCTGCTGTCTTATGGAGGGC    |
| Peak 1723        | Forward          | TTCTGCCCTCTGACATGATTC   |
|                  | Reverse          | CAGATTGGA CTGAAAGGACCA  |
| Peak 2043        | Forward          | TAAGCACCTGGTGA ACTGAG   |
|                  | Reverse          | TATTACGTGGCGTGT CAGG    |
| GAPDH promoter * | Forward          | TGTTATATCCTTGCGGCAGCTT  |
|                  | Reverse          | AGCACTGCGGGAGAGTAGTAACT |

\* Herrmann D et al., Epigenetics 2013 8(3): 281-289 doi:10.4161/epi.23899
